# Supplementary material
Source: publisher site journal article supplement (https://www.dovepress.com/article/365192)
Supplement: Supplementary file 1 [file get_supplementary_file.php]

**Table S1** The complete list of the exclusion criteria

1. Existed diabetes or diabetes diagnosed in the screening stage;
2. Secondary obesity (such as Cushing's syndrome, hypothyroidism);
3. Long-term use of drugs that lead to obesity (such as glucocorticoids);
4. Severe infection, severe injuries, severe and acute cardiovascular and cerebrovascular diseases, or in operation period;
5. A history of malignancy;
6. A history of psychiatric illness or neurological diseases;
7. Combined with rheumatic and immune diseases;
8. Serum TG level more than 11.3 mmol/L;
9. Usage of weight-loss drugs (including GLP-1 receptor agonist) or a history of bariatric surgery within three months;
10. A history or a family history of thyroid medullary carcinoma (MTC), or type 2 multiple endocrine adenoma syndrome (MEN);
11. A history of pancreatitis.
12. Female during pregnancy or lactation;
13. Participate in other clinical trials within three months;
14. Unable, unwilling or unwilling to comply with the research requirements, including lifestyle modification, return visit, dose description and subject responsibility.

**Table S2** Characteristics of the study participants before and after the 4-week run-in

| Variables | Before the 4-week run-in | After the 4-week run-in | Changes  means with 95% CIs |
| --- | --- | --- | --- |
| (n=113) | (n=104) | (n=104) |
| Age (years) | 32±8 | 32±8 |  |
| Male/Female (no.%) | 66/47 (57.9/41.2) | 61/43 (58.7/41.3) |  |
| **Anthropometric variables**  Body weight (kg) | 93.7±16.7 | 90.2±16.2 | -3.3 (-3.8 to -2.9) |
| BMI (kg/m2) | 33.3±4.0 | 32.1±3.9 | -1.2 (-1.3 to -1.0) |
| WC (cm) | 105.1±11.3 | 101.7±11.3 | -3.0 (-3.5 to -2.5) |
| HC (cm) | 109.2±8.7 | 107.3±8.3 | -1.7 (-2.2 to -1.2) |
| WHR | 0.96±0.07 | 0.95±0.07 | -0.01 (-0.02 to 0.00) |
| Muscle mass (kg) | 54.0±11.1 | 53.5±10.3 | -0.5 (-1.3 to 0.4) |
| SMM (kg) | 32.5±6.5 | 31.6±6.8 | -0.8 (-1.4 to -0.2) |
| Fat mass (kg) | 36.0±9.4 | 33.4±8.8 | -2.5 (-2.9 to -2.1) |
| BFP (%) | 38.3±6.0 | 37.0±6.2 | -1.4 (-1.6 to -1.1) |
| VFA (cm2) | 159.2±40.4 | 147.4±41.5 | -11.7 (-14.1 to -9.3) |
| Water (kg) | 42.2±8.0 | 41.6±8.0 | -0.6 (-0.9 to -0.4) |
| **Metabolic Variables**  Blood pressure (mmHg)  Systolic | 137±15 | 132±14 | -4.8 (-7.0 to -2.6) |
| Diastolic | 81±10 | 77±10 | -3.6 (-5.4 to -1.7) |
| Resting heart rate (beats/min) | 77±12 | 71±11 | -5.0 (-7.0 to -2.9) |
| Lipid profile  TC (mmol/L) | 5.32±1.18 | 5.01±0.97 | -0.36 (-0.52 to -0.20) |
| LDL-C (mmol/L) | 3.37±1.05 | 3.16±0.91 | -0.24 (-0.37 to -0.12) |
| HDL-C (mmol/L) | 1.04±0.22 | 1.01±0.22 | -0.04 (-0.06 to -0.01) |
| TG (mmol/l) | 2.13±1.70 | 1.90±1.21 | -0.28 (-0.49 to -0.07) |
| HBA1c (%) | 5.4±0.5 | 5.3±0.4 | -0.2 (-0.2 to -0.1) |
| FBG (mmol/L) | 5.55±0.70 | 5.11±0.62 | -0.45 (-0.57 to -0.33) |
| P2hBG (mmol/L) | 7.72±1.92 | 7.22±1.80 | -0.44 (-0.83 to -0.05) |
| LnFINS (mU/L) | 3.03±0.58 | 2.78±0.51 | -0.24 (-0.33 to -0.14) |
| LnP2hINS (mU/L) | 4.76±0.78 | 4.51±0.75 | -0.22 (-0.36 to -0.07) |
| LnHOMA-IR | 1.62±0.62 | 1.29±0.54- | -0.32 (-0.43 to -0.21) |

**Abbreviations**: BMI, body mass index; WC, waist circumference; HC, hip circumference; WHR,

waist-to-hip ratio; SMM, skeletal muscle mass; BFP, body fat percentage; VFA, visceral fat area; TC, total cholesterol; LDL-C, low-density lipoprotein-cholesterol; HDL-C, high-density lipoprotein-cholesterol; TG, triacylglycerol; HbA1c, glycosylated hemoglobin; FBG, fasting blood glucose; P2hBG, 2h postprandial blood glucose; FINS, fasting plasma insulin; P2hINS, 2h postprandial insulin; HOMA-IR, homeostatic model assessment for insulin resistance.

**Table S3** Treatment effects for anthropometric variables before and after the 12 weeks of Intervention

| Variables | LM (n=50) | | | MMKD (n=19) | | | Beinaglutide (n=21) | | | Difference  among groups |
| --- | --- | --- | --- | --- | --- | --- | --- | --- | --- | --- |
| Week 0 | Week 12 | P value | Week 0 | Week 12 | P value | Week 0 | Week 12 | P value | P value |
| Body weight (kg) | 88.2±13.2 | 85.0±13.8 | <0.001 | 88.1±16.2 | 81.1±15.5* | <0.001 | 91.9±20.0 | 86.1±17.2 | <0.001 | <0.001 |
| BMI (kg/m2) | 31.0±3.1 | 29.9±3.4 | <0.001 | 31.4±3.3 | 28.9±3.3* | <0.001 | 33.7±4.5 | 31.6±4.1 | <0.001 | <0.001 |
| WC (cm) | 100.5±9.0 | 96.5±9.8 | <0.001 | 100.2±10.7 | 93.4±10.0* | <0.001 | 103.6±15.3 | 97.4±13.8 | <0.001 | 0.006 |
| HC (cm) | 105.0±6.2 | 103.3±6.9 | <0.001 | 107.4±7.8 | 102.7±7.8* | <0.001 | 109.4±10.9 | 105.7±9.2 | <0.001 | <0.001 |
| WHR | 0.96±0.06 | 0.93±0.06 | <0.001 | 0.93±0.07 | 0.91±0.06 | 0.005 | 0.94±0.08 | 0.92±0.07 | 0.005 | 0.776 |
| Muscle mass (kg) | 54.4±8.9 | 54.2±9.0 | 0.359 | 52.1±11.4 | 51.2±11.2 | 0.015 | 50.8±10.8 | 49.4±10.0* | 0.009 | 0.008 |
| SMM (kg) | 31.9±6.3 | 32.4±5.6 | 0.494 | 31.1±7.2 | 30.4±7.1 | 0.006 | 30.1±6.7 | 29.2±6.2 | 0.008 | 0.085 |
| Fat mass (kg) | 30.5±7.6 | 27.4±7.7 | <0.001 | 32.9±6.2 | 26.7±7.0* | <0.001 | 38.0±10.6 | 33.8±9.3 | <0.001 | 0.006 |
| BFP (%) | 34.5±6.0 | 32.1±6.5 | <0.001 | 37.6±4.8 | 33.1±6.1* | <0.001 | 41.2±5.4 | 39.1±6.0# | <0.001 | 0.011 |
| VFA (cm2) | 132.4±36.2 | 119.0±37.4 | <0.001 | 147.0±31.7 | 115.4±36.7* | <0.001 | 171.7±45.0 | 154.3±44.7# | <0.001 | 0.002 |
| Water (kg) | 42.3±6.9 | 42.2±7.0 | 0.277 | 40.4±8.8 | 39.8±8.8 | 0.018 | 39.5±8.4 | 38.4±7.8* | 0.008 | 0.010 |

**Notes:** *P < 0.05 compared with the LM arm; # P < 0.05 compared with the MMKD arm.

**Abbreviations:** BMI, body mass index; WC, waist circumference; HC, hip circumference; WHR, waist-to-hip ratio; SMM, skeletal muscle mass; BFP, body fat percentage; VFA, visceral fat area.

**Figure S1.** Change in body weight during the study from week 0 to 12 in ITT analysis.

**Notes:** Marked numbers are the estimated mean differences with 95% CI. LM (black), 12 weeks of HBD with aerobic and resistance exercise; MMKD (blue), two cycles of 2 weeks of KD, 2 weeks of transition diet and 2 weeks of HBD with aerobic and resistance exercise; Beinaglutide (orange), 12 weeks of HBD plus daily injections of beinaglutide (0.4 mg per day) with aerobic and resistance exercise.

**Abbreviations:** ITT, intention to treat analysis; LM, lifestyle modification; MMKD, multiphase modified ketogenic diet; HBD, hypocaloric balanced diet.

**Table S4** Markers of liver, kidney function and uric acid before and after the 12 weeks of Intervention

| Variables | LM (n=50) | | MMKD (n=19) | | Beinaglutide (n=21) | |
| --- | --- | --- | --- | --- | --- | --- |
| Week 0 | Week 12 | Week 0 | Week 12 | Week 0 | Week 12 |
| **Liver function**  Total bilirubin (μmol/L) | 14.9±5.1 | 14.1±4.3 | 14.9±6.1 | 13.6±5.3 | 12.1±4.9 | 11.7±4.3 |
| [Direct](javascript:;) [bilirubin](javascript:;) (μmol/L) | 4.9±1.9 | 4.4±1.5 | 4.9±2.8 | 4.3±2.0 | 4.8±2.8 | 3.6±1.3 |
| Alanine transaminase (U/L) | 44.2±27.8 | 31.3±17.5 | 37.7±27.0 | 25.4±19.2 | 39.4±26.0 | 25.8±18.3 |
| Aspartate transaminase (U/L) | 27.7±10.9 | 22.0±6.8 | 24.7±9.1 | 20.3±5.2 | 26.8±13.1 | 20.1±8.1 |
| [Alkaline](javascript:;) [phosphatase](javascript:;) (U/L) | 87.9±21.8 | 85.0±18.0 | 76.5±23.7 | 78.3±24.7 | 72.5±23.4 | 73.8±27.0 |
| γ-glutamyl transferase (U/L) | 35.9±23.2 | 32.4±19.1 | 37.4±26.0 | 30.5±21.0 | 32.5±31.3 | 30.4±24.6 |
| **Renal function**  Blood urea nitrogen (mmol/L) | 5.1±1.3 | 5.4±1.6 | 4.9±1.5 | 5.2±0.8 | 4.7±0.9 | 5.0±1.0 |
| Creatinine (μmol/L) | 75.5±14.2 | 73.6±13.5 | 71.7±13.2 | 71.0±13.4 | 64.2±11.9 | 63.3±12.1 |
| Uric acid (μmol/L) | 424.9±99.7 | 410.0±98.0 | 457.0±98.1 | 447.9±92.8 | 390.6±92.2 | 378.2±111.3 |

**Abbreviations:** LM, lifestyle modification; MMKD, multiphase modified ketogenic diet.
